# Supplementary material for: A Multi-Site Feasibility Assessment of Implementing a Best-Practices Meet-And-Greet Intervention in Animal Shelters in the United States
Source: MDPI journal article supplement (doi:10.3390/ani10010104), 2020-01-08
Supplement: s1 [file s1]

# A Multi-Site Feasibility Assessment of Implementing a Best-Practices Meet-And-Greet Intervention in Animal Shelters in the United States

Alexandra Protopopova <sup>1,\*</sup>, Kelsea M. Brown <sup>2</sup> and Nathaniel J. Hall <sup>3</sup>

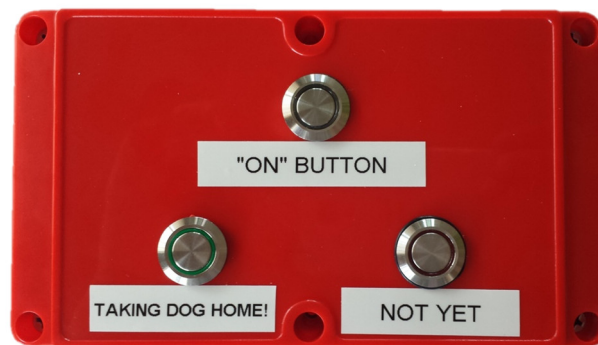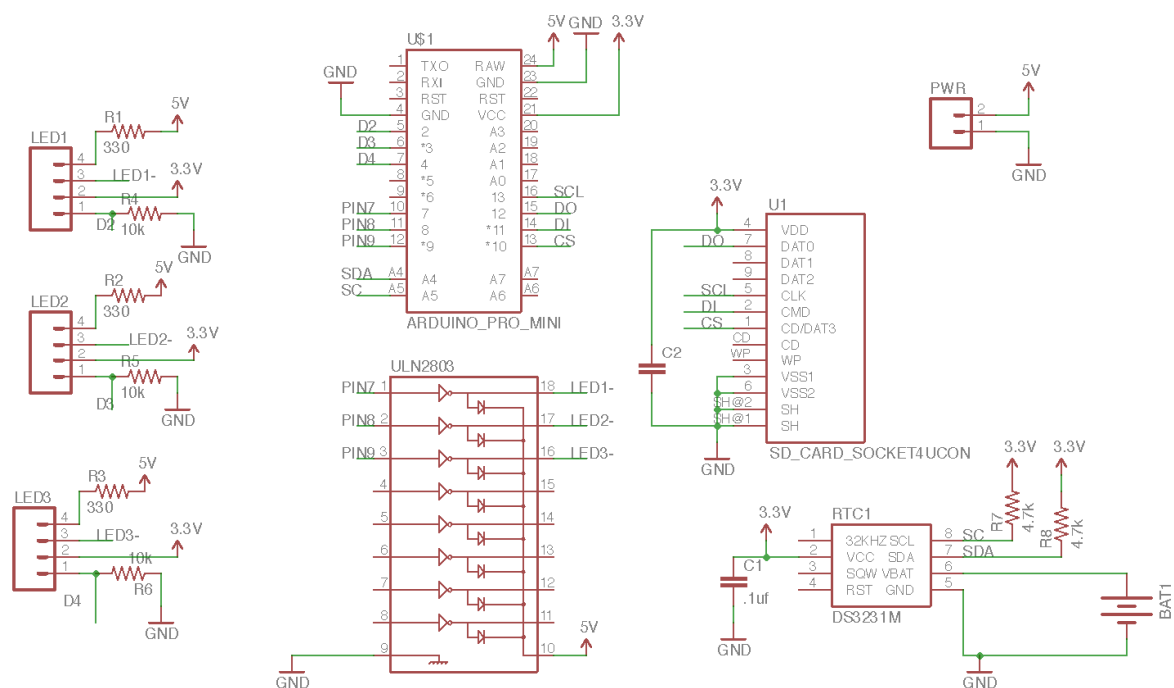

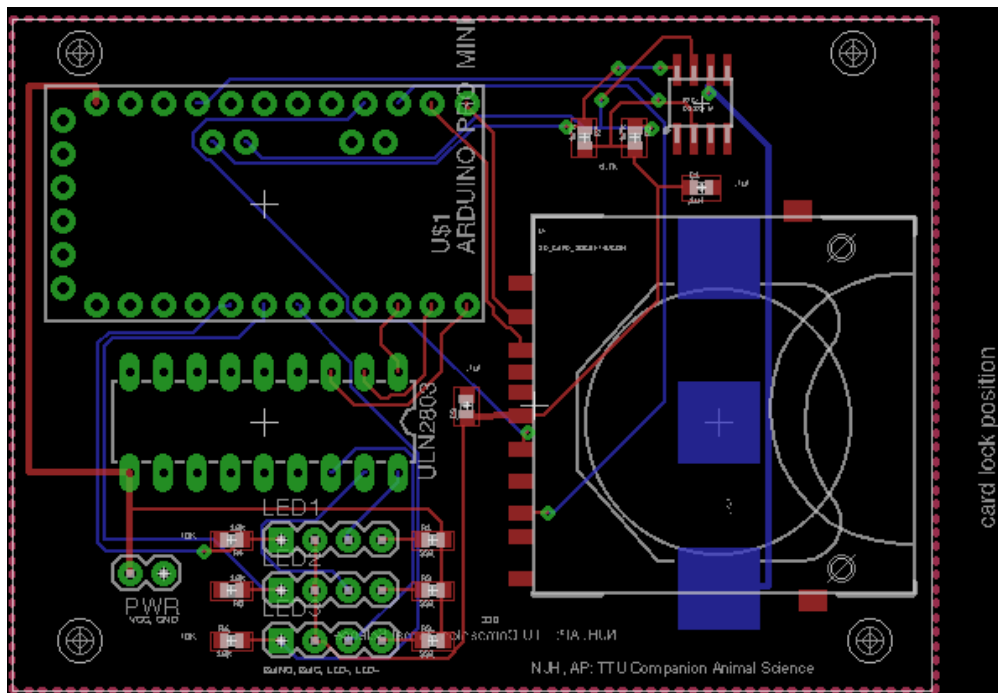

**Figure S1.** The face and electrical diagram of the remote data collection device.

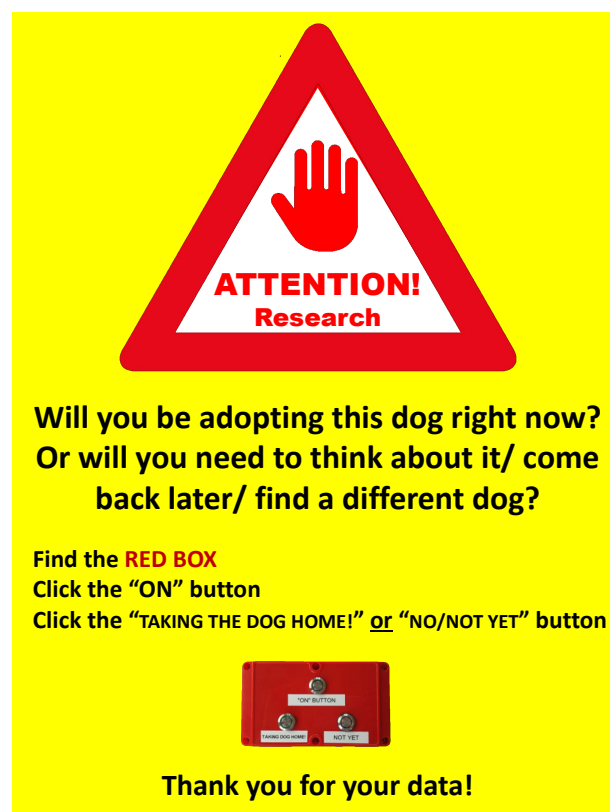

**Figure S2.** A provided poster asked shelter visitors to operate the remote data collection device following a meet-and-greet.

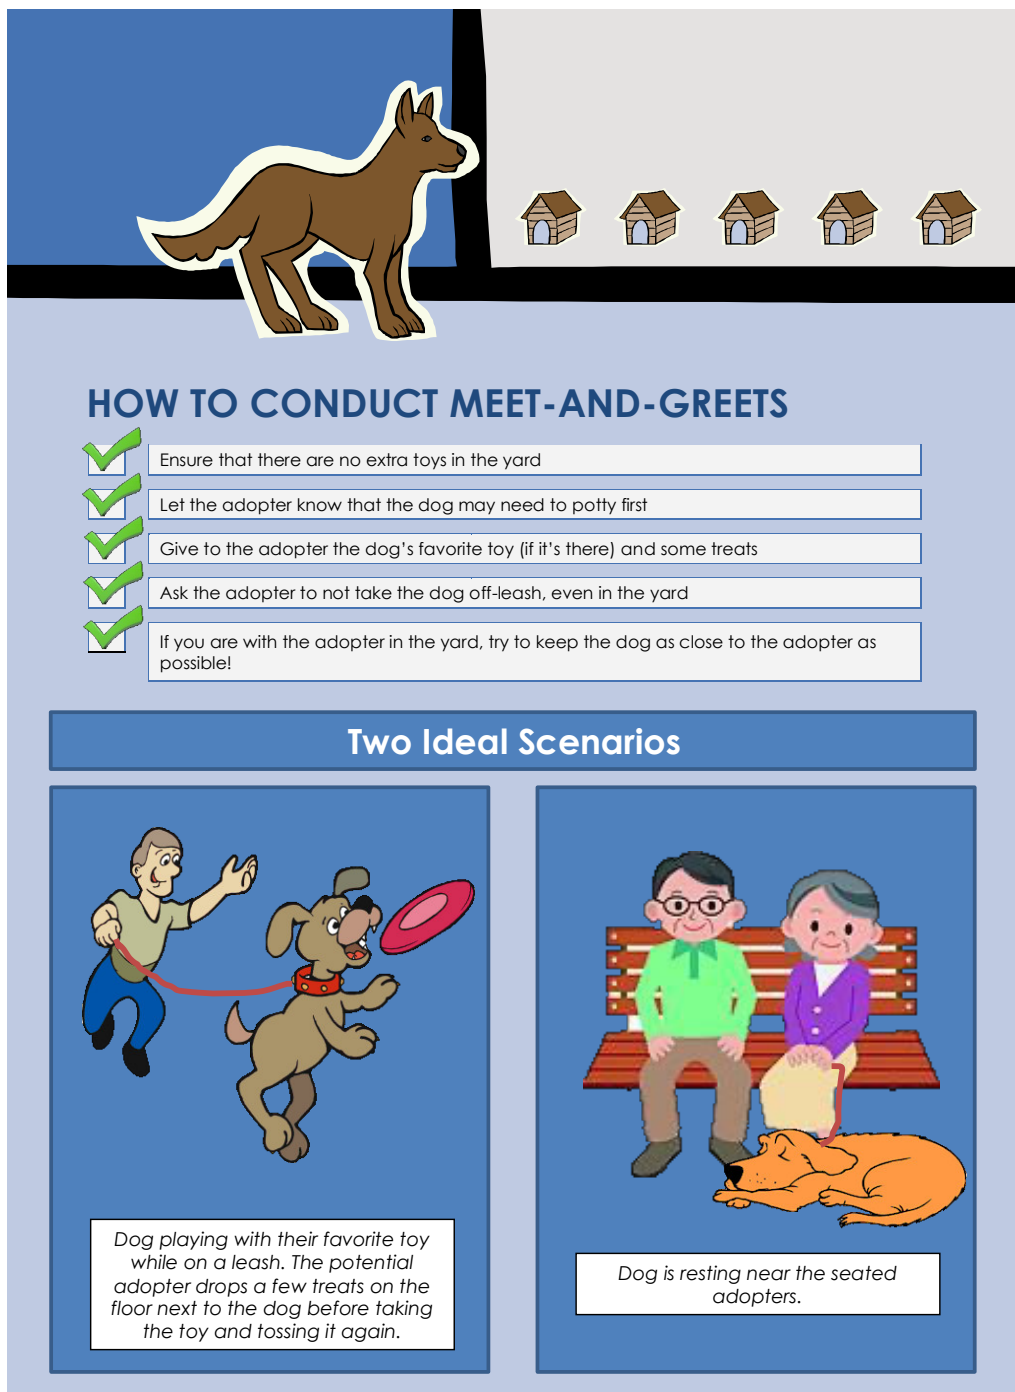

**Figure S3.** A provided “cheat sheet” for the animal shelters to remember the key features of the meet-and-greet intervention.
